# Supplementary material
Source: PubMed Central journal article supplement (PMC7717926)
Supplement: NIHMS1643230-supplement-Supplement.pdf [file NIHMS1643230-supplement-Supplement.pdf]

**Author Listing of Relationships With Industry and Other Entities (Comprehensive)—2019 AHA/ACC Clinical Performance and Quality Measures for Adults With High Blood Pressure (July 2019)**

| Committee Member             | Employment                                                                                                                                                                                                                                                  | Consultant                                                                                                                                                                                           | Speakers Bureau | Ownership/ Partnership/ Principal | Personal Research | Institutional, Organizational, or Other Financial Benefit                                           | Expert Witness                                                                                                                                   |
|------------------------------|-------------------------------------------------------------------------------------------------------------------------------------------------------------------------------------------------------------------------------------------------------------|------------------------------------------------------------------------------------------------------------------------------------------------------------------------------------------------------|-----------------|-----------------------------------|-------------------|-----------------------------------------------------------------------------------------------------|--------------------------------------------------------------------------------------------------------------------------------------------------|
| Donald E. Casey, Jr, Chair   | Thomas Jefferson College of Population Health—Adjunct Faculty; Rush Medical College—Faculty; University of Minnesota, Institute of Health Informatics—Affiliate Faculty; President, American College of Medical Quality; IPO 4 Health—Principal and Founder | <ul style="list-style-type: none"> <li>• NCQA†</li> </ul>                                                                                                                                            | None            | None                              | None              | <ul style="list-style-type: none"> <li>• ACMQ†</li> </ul>                                           | None                                                                                                                                             |
| Randal J. Thomas, Vice Chair | Mayo Clinic—Medical Director, Cardiac Rehabilitation Program                                                                                                                                                                                                | None                                                                                                                                                                                                 | None            | None                              | None              | None                                                                                                | None                                                                                                                                             |
| Vivek Bhalla                 | Stanford University Medical Center—Assistant Professor of Medicine, Nephrology; Stanford Hypertension Center—Director                                                                                                                                       | <ul style="list-style-type: none"> <li>• CareDx</li> <li>• ClearView Healthcare Partners</li> <li>• Cogentia</li> <li>• Maxim Integrated</li> <li>• Relypsa, Inc.</li> <li>• Straflucence</li> </ul> | None            | None                              | None              | <ul style="list-style-type: none"> <li>• Oraxion Therapeutics</li> <li>• PyrAmes Health†</li> </ul> | <ul style="list-style-type: none"> <li>• Plaintiff, delayed disclosure of chronic kidney disease for patient with hypertension, 2017*</li> </ul> |
| Yvonne Commodore-Mensah      | Johns Hopkins School of Nursing—Assistant Professor                                                                                                                                                                                                         | None                                                                                                                                                                                                 | None            | None                              | None              | None                                                                                                | None                                                                                                                                             |

| Committee Member    | Employment                                                                                                                                                                                                                                                                                                                  | Consultant                                                                                                                                                                                                                                                                                                        | Speakers Bureau                                            | Ownership/ Partnership/ Principal                                             | Personal Research                                                                               | Institutional, Organizational, or Other Financial Benefit                                                                                                                                                            | Expert Witness |
|---------------------|-----------------------------------------------------------------------------------------------------------------------------------------------------------------------------------------------------------------------------------------------------------------------------------------------------------------------------|-------------------------------------------------------------------------------------------------------------------------------------------------------------------------------------------------------------------------------------------------------------------------------------------------------------------|------------------------------------------------------------|-------------------------------------------------------------------------------|-------------------------------------------------------------------------------------------------|----------------------------------------------------------------------------------------------------------------------------------------------------------------------------------------------------------------------|----------------|
| Paul A. Heidenreich | Stanford VA Palo Alto Health Care System—Professor of Medicine                                                                                                                                                                                                                                                              | None                                                                                                                                                                                                                                                                                                              | None                                                       | None                                                                          | <ul style="list-style-type: none"> <li>• Bracco Diagnostics</li> </ul>                          | None                                                                                                                                                                                                                 | None           |
| Dhaval Kolte        | Massachusetts General Hospital and Harvard Medical School—International Cardiology Fellow                                                                                                                                                                                                                                   | None                                                                                                                                                                                                                                                                                                              | None                                                       | None                                                                          | None                                                                                            | None                                                                                                                                                                                                                 | None           |
| Paul Muntner        | University of Alabama at Birmingham—Professor, Department of Epidemiology                                                                                                                                                                                                                                                   | <ul style="list-style-type: none"> <li>• Amgen Inc.</li> <li>• National Center for Health Statistics*</li> </ul>                                                                                                                                                                                                  | None                                                       | None                                                                          | <ul style="list-style-type: none"> <li>• AHA*</li> <li>• Amgen Inc.*</li> <li>• NIH*</li> </ul> | None                                                                                                                                                                                                                 | None           |
| Sidney C. Smith, Jr | University of North Carolina at Chapel Hill—Professor of Medicine; Division of Cardiology, Department of Medicine                                                                                                                                                                                                           | None                                                                                                                                                                                                                                                                                                              | None                                                       | None                                                                          | None                                                                                            | None                                                                                                                                                                                                                 | None           |
| John A. Spertus     | Washington University School of Medicine in St. Louis—Adjunct Professor of Medicine, Cardiovascular Division; Saint Luke’s Mid America Heart Institute—Director, Health Outcomes Research; University of Missouri-Kansas City—Professor, Daniel J. Lauer Missouri Endowed Chair in Metabolism and Vascular Disease Research | <ul style="list-style-type: none"> <li>• AstraZeneca*</li> <li>• Bayer Healthcare Pharmaceuticals</li> <li>• Boehringer Ingelheim*</li> <li>• Janssen*</li> <li>• Merck Sharp &amp; Dohme Corporation*</li> <li>• Novartis*</li> <li>• Regeneron Pharmaceuticals, Inc.*</li> <li>• SAQ, KCCQ, and PAQ*</li> </ul> | <ul style="list-style-type: none"> <li>• Abbott</li> </ul> | <ul style="list-style-type: none"> <li>• Health Outcomes Sciences*</li> </ul> | <ul style="list-style-type: none"> <li>• ACC*</li> </ul>                                        | <ul style="list-style-type: none"> <li>• ACC Foundation*</li> <li>• AHA†</li> <li>• AstraZeneca UK Limited</li> <li>• Blue Cross Blue Shield of Kansas City*</li> <li>• CV Outcomes†</li> <li>• Novartis*</li> </ul> | None           |

| Committee Member   | Employment                                                                                                                                  | Consultant                                                                                      | Speakers Bureau | Ownership/ Partnership/ Principal | Personal Research                                                                                                               | Institutional, Organizational, or Other Financial Benefit                       | Expert Witness |
|--------------------|---------------------------------------------------------------------------------------------------------------------------------------------|-------------------------------------------------------------------------------------------------|-----------------|-----------------------------------|---------------------------------------------------------------------------------------------------------------------------------|---------------------------------------------------------------------------------|----------------|
|                    |                                                                                                                                             | <ul style="list-style-type: none"> <li>• United Healthcare Scientific Advisory Board</li> </ul> |                 |                                   |                                                                                                                                 |                                                                                 |                |
| John R. Windle     | University of Nebraska College of Medicine—Professor, Internal Medicine, Division of Cardiovascular Medicine                                | <ul style="list-style-type: none"> <li>• IBM Watson</li> </ul>                                  | None            | None                              | <ul style="list-style-type: none"> <li>• Agency for Healthcare Research and Quality*</li> <li>• Pew Charitable Trust</li> </ul> | <ul style="list-style-type: none"> <li>• WebMD*</li> </ul>                      | None           |
| Gregory D. Wozniak | American Medical Association—Director, Outcomes Analytics; Northwestern University, Feinberg School of Medicine—Adjunct Assistant Professor | None                                                                                            | None            | None                              | None                                                                                                                            | <ul style="list-style-type: none"> <li>• AHRQ†</li> <li>• NACHC/CDC†</li> </ul> | None           |
| Boback Ziaieian    | UCLA David Geffen School of Medicine—Assistant Professor; US Department of Veterans Affairs—Assistant Professor                             | <ul style="list-style-type: none"> <li>• AHA</li> </ul>                                         | None            | None                              | <ul style="list-style-type: none"> <li>• ACC</li> <li>• AHA*</li> </ul>                                                         | <ul style="list-style-type: none"> <li>• AHA*</li> </ul>                        | None           |

This table represents all relationships of committee members with industry and other entities that were reported by authors, including those not deemed to be relevant to this document, at the time this document was under development. The table does not necessarily reflect relationships with industry at the time of publication. A person is deemed to have a significant interest in a business if the interest represents ownership of  $\geq 5\%$  of the voting stock or share of the business entity, or ownership of  $\geq \$5,000$  of the fair market value of the business entity; or if funds received by the person from the business entity exceed 5% of the person's gross income for the previous year. Relationships that exist with no financial benefit are also included for the purpose of transparency. Relationships in this table are modest unless otherwise noted. Please refer to <http://www.acc.org/guidelines/about-guidelines-and-clinical-documents/relationships-with-industry-policy> for definitions of disclosure categories or additional information about the ACC/AHA Disclosure Policy for WCs.

\*Significant relationship.

†No financial benefit.

ACC indicates American College of Cardiology; ACMQ, American College of Medical Quality; AHA, American Heart Association; NIH, National Institutes of Health; UCLA, University of California, Los Angeles; and VA, Veterans Affairs.
